# Supplementary material for: A novel decoy strategy for polymyxin resistance in Acinetobacter baumannii
Source: eLife. 2021 Jun 28;10:e66988. doi: 10.7554/eLife.66988 (PMC8324293; doi:10.7554/eLife.66988)
Supplement: Figure 1—source data 1. [file elife-66988-fig1-data1.xlsx]

## Sheet: Sheet1
Figure 1A		0	0.25	0.5	1	2	4	8	16	32	64	128	256
	WT	0.980517	1.06107	1.04343	0.0789553	0.045833	0.045649	0.0454093	0.045426	0.046066	0.0456357	0.0454913	0.0459913
	PMRLow	1.15988	1.02309	1.05098	0.475305	0.0883218	0.0466163	0.0458937	0.045926	0.0458448	0.0455692	0.0458037	0.0464002
	stdev	0.0572992	0.0869011	0.135463	0.42884	0.0116557	2.12132e-05	0.000352611	0.00036581	0.000365574	0.000190212	6.45824e-05	0.000457969
	PMRHigh	0.579436	0.53937	0.569748	0.652253	0.700282	0.719582	0.533812	0.368275	0.185495	0.0947787	0.0530105	0.0476217
	stdev	0.417453	0.433075	0.309508	0.242269	0.151229	0.0328593	0.18945	0.185302	0.0261465	0.0692936	0.00977104	0.00176211
Figure 1B	N	Lab-WT	PMRLow	PMRHigh
	1	-18	-14.25	-17.18
	2	-25.2	-20.22	-16.58
	3	-22.4	-22.4	0.21
	4	-22.325	-23.04	-8.485
	5	-15.1	-15.1	0
	6	-25	-19.18	3
	7	-20.565	-18.5187	-6.50583
	8	-24.3	-22.125	-10.58
	9	-20.565	-18.9927	-7.0151
	10	-21.08	-20.11	2.21
Figure 1C	Strains	Lab-WT	PMRHigh	Lab-WT+PMB	PMRHigh+PMB
	Average	40.4627	95	70	120
	stdev	4.04908	5.23802	9.04908	8.23802
