# Supplementary material for: A novel decoy strategy for polymyxin resistance in Acinetobacter baumannii
Source: eLife. 2021 Jun 28;10:e66988. doi: 10.7554/eLife.66988 (PMC8324293; doi:10.7554/eLife.66988)
Supplement: Figure 3—source data 1. [file elife-66988-fig3-data1.xlsx]

## Sheet: Sheet1
Figure 3A		RQ	RQ Min	RQ Max	stdev
	pmrC	4.00298	3.83288	4.17308	0.1701
	pmrA	13.2019	13.0318	13.3029	0.10092
	pmrB	11.9709	11.8008	12.2511	0.28022
	pgaB	4.55055	4.38045	4.55256	0.00201
	ompA	0.643852	0.473752	0.755007	0.111155
	lpp	0.619899	0.449799	0.747386	0.127488
	mlaC	0.250918	0.0808181	0.362073	0.111155
	bamE	0.25559	0.08549	0.25559	0
	udg	0.256737	0.0866368	0.384225	0.127488
	ftsL	0.407798	0.237698	0.704863	0.297064
