# Supplementary material for: A novel decoy strategy for polymyxin resistance in Acinetobacter baumannii
Source: eLife. 2021 Jun 28;10:e66988. doi: 10.7554/eLife.66988 (PMC8324293; doi:10.7554/eLife.66988)
Supplement: Figure 3—source data 3. [file elife-66988-fig3-data3.xlsx]

## Sheet: Sheet2
Protein	Phosphoethanolamine transferase EptA domain protein, partial, Pmrc	Poly-beta-1,6-N-acetyl-D-glucosamine N-deacetylase PgaB	Poly-beta-1,6-N-acetyl-D-glucosamine N-deacetylase PgaB	Poly-beta-1,6-N-acetyl-D-glucosamine N-deacetylase PgaB	D-alanyl-D-alanine carboxypeptidase, DacC	Alanine racemase, alr	Alanine racemase, alr	Bifunctional protein FolD	Outer membrane protein A, OmpA	Ferric uptake regulation protein, fur	Elongation factor Tu 2
m/z	842.51	832.18	832.18	832.18	842.509	832.171	832.171	909.344	870.416	842.509	909.351
	856.531	870.419	870.419	870.419	870.55	842.368	842.368	948.321	894.361	870.557	918.359
	869.54	909.344	909.344	909.344	888.521	856.387	856.387	1074.45	909.339	948.579	948.329
	870.554	951.425	951.425	951.425	909.478	870.411	870.411	1091.49	1003.44	1053.69	1097.45
	909.475	1194.51	1194.51	1194.51	953.552	1045.46	1045.46	1123.48	1022.49	1181.77	1125.47
	917.292	1339.73	1339.73	1339.73	1206.76	1127.62	1127.62	1125.46	1350.64	1186.7	1185.59
	987.61	1577.75	1577.75	1577.75	1273.74	1189.54	1189.54	1209.7	1433.7	1201.65	1232.56
	1045.61	1612.84	1612.84	1612.84	1339.81	1205.53	1205.53	1232.54	1465.71	1217.64	1303.69
	1095.58	1713.85	1713.85	1713.85	1557.93	1618.8	1618.8	1237.68	1551.69	1320.73	1318.66
	1097.55	1731.92	1731.92	1731.92	1646.92	1774.88	1774.88	1339.55	1571.82	1334.78	1339.58
	1128.73	1753.88	1753.88	1753.88	1654.83	1824.88	1824.88	1350.63	1687.92	1370.96	1345.6
	1182.74	1763.89	1763.89	1763.89	1670.84	1877.97	1877.97	1578.76	1707.78	1412.81	1347.72
	1204.7	1790.84	1790.84	1790.84	1688	2040.91	2040.91	1687.92	1791.69	1428.81	1350.65
	1214.73	1808.83	1808.83	1808.83	1733.98	2079.99	2079.99	1707.72	1812.84	1469.81	1372.64
	1220.68	1813.97	1813.97	1813.97	1808.88	2211.1	2211.1	1791.69	1828.86	1473.85	1379.69
	1232.65	1859.99	1859.99	1859.99	1917.02	2233.05	2233.05	1949.01	1856.98	1489.83	1385.72
	1248.68	1903.94	1903.94	1903.94	2028.12	2261.08	2261.08	2010.93	1999.94	1588.92	1391.75
	1266.71	1927.02	1927.02	1927.02	2211.1	2389.18	2389.18	2054.98	2015.98	1609.81	1475.71
	1288.69	2211.1	2211.1	2211.1	2284.16	2496.25	2496.25	2202.06	2028.93	1630.87	1650.82
	1304.66	2283.16	2283.16	2283.16	2300.16	2512.27	2512.27	2211.06	2127.07	1639.94	1687.95
	1318.74	2285.2	2285.2	2285.2	2765.19	2577.2	2577.2	2238.1	2162.16	1646.87	1707.76
	1327.86	2299.16	2299.16	2299.16	2781.19	2714.35	2714.35	2283.13	2180.08	1697.88	1791.72
	1350.73	2383.26	2383.26	2383.26	3119.57	2783.34	2783.34	2299.15	2211.1	1730.96	1812.85
	1372.73	2446.16	2446.16	2446.16		2867.3	2867.3	2383.9	2284.13	1788.86	1907.08
	1426.84	2621.31	2621.31	2621.31				2496.25	2300.17	1801.04	2015.08
	1459.79	3306.62	3306.62	3306.62				2528.21	2348.19	1876.01	2056.98
	1598.86							3223.25	2838.47	1910.94	2096.96
	1617.9								2863.83	1914.07	2211.1
	1645.9								2880.43	1924.05	2218.01
	1657.8								2896.41	1935.92	2283.11
	1674.93									1986.03	2299.18
	1688									2164.95	2383.95
	1690.92									2211.1	2399.15
	1696.89									2233.07	2415.14
	1712.83									2407.14	2685.35
	1808.92									2423.14	2696.33
	1811.8									2447.11	2705.13
	1813.9									2540.22	3223.31
	1824.91									2709.21	3621.44
	1859									2726.22
	1978.06									2805.23
	2055.95									3217.51
	2096.96
	2120.13
	2211.1
	2233.04
	2243.15
	3223.12
	3620.42
