# Supplementary material for: A novel decoy strategy for polymyxin resistance in Acinetobacter baumannii
Source: eLife. 2021 Jun 28;10:e66988. doi: 10.7554/eLife.66988 (PMC8324293; doi:10.7554/eLife.66988)
Supplement: Figure 4—source data 1. [file elife-66988-fig4-data1.xlsx]

## Sheet: Sheet1
Figure 4A		Lab-WT	delta pmrB	Lab-WT+pRK-pmrB	PMRLow	PMRHigh	delta udg	delta ftsL	delta lpp	delta mlaC	delta pgaB
	Average	34.7027	21.6153	27.9078	53.4818	113.119	60.9726	74.3875	60.0882	65.1692	22.8079
	stdev	9.337	10.8187	4.38529	6.17614	5.73221	10.3474	6.57499	7.53511	7.53511	7.53511
Figure 4B		Lab-WT	delta pmrB	Lab-WT+pRK-pmrB	PMRLow	PMRHigh	delta udg	delta ftsL	delta lpp	delta mlaC	delta pgaB
	Average	15.5804	10.1924	23.0009	20.9163	24.6005	35.0355	38.1513	30.1554	40.0111	10.9213
	stdev	6.84607	4.59123	3.26147	7.47164	6.90796	7.56566	3.85681	7.43104	2.06432	3.43104
Figure 4C		Lab-WT	delta pmrB	Lab-WT+pRK-pmrB	PMRLow	PMRHigh	delta udg	delta ftsL	delta lpp	delta mlaC	delta pgaB
	Average	24.3163	14.56	30.3211	38.5412	51.0042	30	35.8433	37.5008	40.0893	19.1882
	stdev	3.56154	1.24448	2.01741	3.94108	4.77409	5.10223	2.60615	4.03986	5.3119	2.00712
Figure 4D		Lab-WT	delta pmrB	Lab-WT+pRK-pmrB	PMRLow	PMRHigh	delta udg	delta ftsL	delta lpp	delta mlaC	delta pgaB
	Average	2.75425	1.68476	3.77708	4.28234	4.73688	5.19111	4.5	5.47269	5.8	1.4
	stdev	0.661498	0.0810068	0.160486	0.656454	0.535925	2	1.492	0.370904	1.492	0.370904
Figure 4E		Lab-WT	delta pmrB	Lab-WT+pRK-pmrB	PMRLow	PMRHigh	delta udg	delta ftsL	delta lpp	delta mlaC	delta pgaB
		2	1	4	4	7.5	2	2	2	2.5	2
Figure 4F		Lab-WT	delta pmrB	Lab-WT+pRK-pmrB	PMRLow	PMRHigh	delta udg	delta ftsL	delta lpp	delta mlaC	delta pgaB
	Average	5.88235	0	10	9.09091	20	15	17	25	22	3
	stdev	1	0	2.021	2.132	2.132	1.706	2.322	3.894	2.011	0.742
