# Supplementary material for: A novel decoy strategy for polymyxin resistance in Acinetobacter baumannii
Source: eLife. 2021 Jun 28;10:e66988. doi: 10.7554/eLife.66988 (PMC8324293; doi:10.7554/eLife.66988)
Supplement: Figure 5—source data 1. [file elife-66988-fig5-data1.xlsx]

## Sheet: Figure 5A
	Average			Stev
LB control 1st	WT	Low	High	WT	Low	High
0	0.0845	0.084	0.0855	0.000707107	0	0.000707107
2	0.087	0.085	0.0915	0	0	0.00919239
4	0.1185	0.1005	0.098	0.000707107	0.000707107	0.00848528
6	0.177	0.158	0.135	0.00141421	0.00141421	0.00282843
8	0.226	0.209	0.1705	0.00141421	0.00565685	0.00212132
10	0.2885	0.2555	0.2135	0.00353553	0.000707107	0.00353553
12	0.3715	0.313	0.248	0.00777817	0.0183848	0.0141421
14	0.484	0.417	0.3275	0.00707107	0.00424264	0.00212132
16	0.585	0.527	0.4415	0.00565685	0.0113137	0.0318198
18	0.675	0.654	0.551	0.00989949	0.00565685	0.00989949
20	0.764	0.7765	0.645	0.0113137	0.00919239	0.00141421
22	0.8375	0.862	0.73	0.0120208	0.00989949	0.0268701
24	0.8915	0.9305	0.787	0.0148492	0.00212132	0.0254558
26	0.9375	0.9735	0.8335	0.0233345	0.00353553	0.0233345
28	0.965	0.998	0.877	0.0226274	0.0127279	0.019799
30	0.9915	1.0075	0.917	0.0346482	0.0205061	0.0155563
32	0.998	1.014	0.9435	0.0296985	0.019799	0.013435
34	1.009	1.0185	0.971	0.0282843	0.0148492	0.0141421
36	1.025	1.0265	0.9885	0.0254558	0.0233345	0.0120208
38	1.046	1.037	1.004	0.0226274	0.0254558	0.00989949
40	1.065	1.0455	1.015	0.0183848	0.033234	0.00848528
42	1.0825	1.052	1.0215	0.0148492	0.0311127	0.0106066
44	1.09	1.052	1.0275	0.0183848	0.0381838	0.00919239
46	1.1	1.061	1.029	0.0127279	0.0339411	0.00848528
48	1.11	1.063	1.0325	0.0127279	0.0339411	0.00919239
50	1.1145	1.0645	1.0345	0.013435	0.0318198	0.00919239
52	1.127	1.0665	1.0405	0.0155563	0.0304056	0.00777817
54	1.132	1.072	1.0475	0.0141421	0.0254558	0.00212132
56	1.1395	1.0775	1.0525	0.0148492	0.0190919	0.00212132
58	1.1465	1.08	1.058	0.013435	0.0183848	0.00141421
60	1.152	1.0795	1.065	0.00989949	0.00919239	0.00282843
62	1.1525	1.0775	1.0705	0.0120208	0.00777817	0.00353553
64	1.159	1.083	1.0715	0.00989949	0.00282843	0.00494975
66	1.161	1.0825	1.077	0.0113137	0.000707107	0.00424264
68	1.1545	1.082	1.0765	0.00777817	0	0.00353553
70	1.1545	1.0845	1.0765	0.00777817	0.00353553	0.00212132
72	1.1535	1.085	1.0835	0.00636396	0.00707107	0.00494975
LB control+OMVs 1st	Average			Stev
	WT+	Low+	High+	WT	Low	High
0	0.086	0.086	0.086	0.00141421	0	0.00141421
2	0.088	0.087	0.0865	0	0	0.000707107
4	0.123	0.1055	0.095	0.00141421	0.000707107	0.00141421
6	0.1715	0.16	0.141	0.00212132	0	0.00141421
8	0.224	0.214	0.174	0.00141421	0	0.00141421
10	0.283	0.2485	0.216	0.00282843	0.000707107	0.00424264
12	0.3465	0.328	0.251	0.000707107	0	0.0113137
14	0.46	0.4155	0.343	0.00141421	0.00919239	0.00848528
16	0.555	0.5385	0.422	0.00282843	0.00919239	0.0127279
18	0.6395	0.6395	0.5445	0.00636396	0.0106066	0.0289914
20	0.734	0.752	0.634	0.00424264	0.0212132	0.0254558
22	0.807	0.8305	0.701	0.00848528	0.033234	0.019799
24	0.866	0.8855	0.7595	0.00565685	0.0388909	0.013435
26	0.912	0.9235	0.813	0.00565685	0.0459619	0.00848528
28	0.9405	0.9415	0.8595	0.000707107	0.0516188	0.0120208
30	0.9605	0.9495	0.8975	0.00353553	0.0445477	0.00636396
32	0.972	0.957	0.9315	0.00565685	0.0381838	0.00494975
34	0.9995	0.9605	0.9565	0.0162635	0.0289914	0.00353553
36	1.0195	0.9655	0.9775	0.00919239	0.0148492	0.00212132
38	1.0475	0.9775	0.9925	0.00212132	0.0106066	0.000707107
40	1.0615	0.988	1.0045	0.000707107	0.0226274	0.00636396
42	1.0775	0.9985	1.0135	0.000707107	0.026163	0.00494975
44	1.086	1.007	1.0155	0.00424264	0.0311127	0.0106066
46	1.098	1.0175	1.02	0.00424264	0.033234	0.019799
48	1.106	1.0215	1.023	0.00282843	0.0403051	0.0282843
50	1.1115	1.0235	1.0255	0.00494975	0.0318198	0.0289914
52	1.1195	1.0255	1.0295	0.00494975	0.0205061	0.0346482
54	1.122	1.0365	1.0325	0.00565685	0.0247487	0.0374767
56	1.1255	1.0465	1.0415	0.00636396	0.0247487	0.0346482
58	1.131	1.054	1.0475	0.00707107	0.0282843	0.0360624
60	1.1345	1.0645	1.0515	0.00777817	0.0289914	0.0403051
62	1.1345	1.0645	1.057	0.00777817	0.0360624	0.0367696
64	1.1395	1.076	1.0615	0.00353553	0.0353553	0.0388909
66	1.1415	1.078	1.065	0.00919239	0.0353553	0.0410122
68	1.1415	1.084	1.067	0.00494975	0.0381838	0.0438406
70	1.1415	1.0875	1.069	0.00777817	0.0459619	0.0410122
72	1.14	1.0885	1.0705	0.00282843	0.0417193	0.0445477
PMB 1- 1st	Average			Stev
	WT	Low	High	WT	Low	High
0	0.0835	0.0835	0.0835	0.000707107	0.000707107	0.000707107
2	0.0845	0.0845	0.0845	0.000707107	0.000707107	0.000707107
4	0.0945	0.0885	0.0925	0.00494975	0.000707107	0.000707107
6	0.12	0.112	0.138	0.00282843	0.00141421	0
8	0.167	0.1425	0.163	0	0.00353553	0
10	0.1945	0.1795	0.2005	0.00636396	0.000707107	0.00212132
12	0.2215	0.2185	0.236	0.00494975	0.00212132	0.00565685
14	0.284	0.2555	0.321	0.00282843	0.00636396	0.00424264
16	0.3525	0.2995	0.4235	0.000707107	0.0120208	0.0162635
18	0.4	0.3585	0.5305	0.00141421	0.0176777	0.0275772
20	0.465	0.44	0.628	0.00707107	0.00424264	0.00848528
22	0.514	0.5255	0.6905	0.00565685	0.00636396	0.0106066
24	0.5615	0.577	0.745	0.0106066	0.00565685	0.0169706
26	0.6085	0.6255	0.7905	0.0106066	0.0233345	0.0205061
28	0.645	0.6685	0.84	0.0183848	0.0318198	0.0212132
30	0.6815	0.707	0.8755	0.0205061	0.0339411	0.0247487
32	0.718	0.7475	0.91	0.019799	0.0403051	0.0212132
34	0.752	0.785	0.939	0.0183848	0.0452548	0.0254558
36	0.783	0.8175	0.9675	0.0141421	0.0403051	0.0247487
38	0.813	0.8485	0.987	0.0113137	0.0445477	0.0226274
40	0.8345	0.873	1.0035	0.00636396	0.0424264	0.0247487
42	0.8595	0.8975	1.015	0.00212132	0.0502046	0.0212132
44	0.876	0.9155	1.0235	0.00141421	0.0459619	0.0233345
46	0.894	0.926	1.0295	0.00707107	0.0452548	0.0247487
48	0.91	0.937	1.034	0.0113137	0.0424264	0.0212132
50	0.923	0.9425	1.039	0.0141421	0.0360624	0.0240416
52	0.9375	0.9515	1.047	0.0190919	0.0360624	0.0226274
54	0.9535	0.9625	1.0585	0.0219203	0.0360624	0.0247487
56	0.9665	0.9745	1.066	0.0247487	0.0417193	0.0254558
58	0.9805	0.985	1.074	0.0247487	0.0410122	0.0226274
60	0.9905	0.9945	1.08	0.0233345	0.0403051	0.0240416
62	0.9945	0.996	1.084	0.0247487	0.0353553	0.0240416
64	1.0045	1.0065	1.0905	0.0219203	0.0346482	0.0219203
66	1.015	1.015	1.0975	0.0240416	0.039598	0.0219203
68	1.0215	1.021	1.1	0.0162635	0.0282843	0.0240416
70	1.0285	1.0345	1.107	0.013435	0.0275772	0.0268701
72	1.034	1.041	1.111	0.0155563	0.0240416	0.0254558
PMB 1+OMVs 1st	Average			Stev
	WT+	Low+	High+	WT	Low	High
0	0.092	0.0915	0.0915	0.00424264	0.00212132	0.00212132
2	0.0935	0.0925	0.0925	0.00353553	0.00212132	0.00212132
4	0.117	0.104	0.101	0.00282843	0.00282843	0.00282843
6	0.1635	0.148	0.148	0.00212132	0.00424264	0.00282843
8	0.2025	0.1875	0.1795	0.00353553	0.00636396	0.00636396
10	0.2455	0.2305	0.221	0.00777817	0.00777817	0.00141421
12	0.326	0.2655	0.2715	0.00848528	0.0120208	0.013435
14	0.3925	0.348	0.325	0.00494975	0.0155563	0.00989949
16	0.4715	0.3635	0.4265	0.0205061	0.00636396	0.013435
18	0.545	0.4775	0.5425	0.0127279	0.0360624	0.0120208
20	0.6135	0.558	0.6295	0.0275772	0.0565685	0.026163
22	0.676	0.6185	0.6955	0.039598	0.0572756	0.0275772
24	0.7335	0.6735	0.7485	0.0544472	0.0827315	0.0360624
26	0.788	0.7295	0.7995	0.059397	0.0997021	0.0403051
28	0.835	0.779	0.8415	0.0692965	0.104652	0.0374767
30	0.8815	0.8255	0.8745	0.0784889	0.113844	0.0403051
32	0.9255	0.86	0.91	0.0898026	0.118794	0.0410122
34	0.962	0.8805	0.9385	0.0989949	0.111016	0.0445477
36	0.9955	0.8965	0.963	0.108187	0.0982878	0.0438406
38	1.025	0.9125	0.9835	0.110309	0.0940452	0.0388909
40	1.0465	0.9435	0.998	0.118087	0.113844	0.0381838
42	1.0685	0.96	1.0155	0.126572	0.121622	0.033234
44	1.0885	0.9785	1.0225	0.1393	0.140714	0.0360624
46	1.105	0.9985	1.0265	0.145664	0.161927	0.0403051
48	1.121	1.0195	1.029	0.152735	0.185969	0.0438406
50	1.1305	1.029	1.033	0.156271	0.186676	0.0480833
52	1.1445	1.045	1.0385	0.153442	0.193747	0.0544472
54	1.151	1.049	1.0485	0.151321	0.18809	0.0601041
56	1.1595	1.0545	1.055	0.147785	0.181726	0.0678823
58	1.168	1.06	1.0655	0.14425	0.172534	0.0671751
60	1.173	1.0665	1.0735	0.140007	0.164756	0.0714178
62	1.174	1.0655	1.0735	0.135765	0.147785	0.0756604
64	1.1805	1.0815	1.082	0.133643	0.147785	0.0749533
66	1.187	1.0865	1.0795	0.128693	0.142128	0.0784889
68	1.19	1.093	1.087	0.128693	0.132936	0.0763675
70	1.1935	1.0985	1.09	0.123744	0.126572	0.0735391
72	1.1965	1.1015	1.0905	0.118087	0.123744	0.0756604
PMB 2- 1st	Average			stdev
	WT	Low	High	WT	Low	High
0	0.085	0.085	0.085	0.00141421	0.00141421	0.00141421
2	0.0855	0.0855	0.0855	0.000707107	0.00212132	0.00212132
4	0.0895	0.0865	0.093	0.000707107	0.00212132	0.00141421
6	0.087	0.0855	0.128	0.00141421	0.00212132	0.00282843
8	0.086	0.085	0.1485	0.00141421	0.00141421	0.00212132
10	0.0845	0.084	0.1775	0.000707107	0.00141421	0.00353553
12	0.0855	0.085	0.225	0.000707107	0.00141421	0.00424264
14	0.085	0.085	0.284	0.00141421	0.00141421	0.00848528
16	0.085	0.085	0.348	0.00141421	0.00141421	0.0113137
18	0.084	0.084	0.456	0.00141421	0.00141421	0.0127279
20	0.085	0.085	0.516	0.00141421	0.00141421	0.00989949
22	0.085	0.0875	0.5915	0.00141421	0.00212132	0.033234
24	0.085	0.1015	0.631	0.00141421	0.0219203	0.0240416
26	0.085	0.1225	0.6725	0.00141421	0.0516188	0.026163
28	0.085	0.138	0.708	0.00141421	0.0735391	0.0212132
30	0.085	0.178	0.739	0.00141421	0.130108	0.0183848
32	0.085	0.1865	0.769	0.00141421	0.142128	0.019799
34	0.085	0.2355	0.7945	0.00141421	0.211425	0.0176777
36	0.085	0.277	0.818	0.00141421	0.270115	0.0212132
38	0.085	0.306	0.838	0.00141421	0.311127	0.0226274
40	0.0845	0.3215	0.8515	0.000707107	0.334462	0.026163
42	0.085	0.3425	0.8655	0.00141421	0.362746	0.0318198
44	0.085	0.355	0.8735	0.00141421	0.380423	0.0318198
46	0.085	0.3615	0.8795	0.00141421	0.389616	0.0346482
48	0.085	0.3625	0.884	0.00141421	0.39103	0.0353553
50	0.085	0.356	0.8835	0.00141421	0.383252	0.0346482
52	0.0855	0.361	0.8885	0.00212132	0.388909	0.0374767
54	0.0855	0.36	0.8895	0.00212132	0.387495	0.0346482
56	0.086	0.36	0.8925	0.00141421	0.387495	0.033234
58	0.086	0.3605	0.897	0.00141421	0.388202	0.0339411
60	0.086	0.361	0.9035	0.00141421	0.387495	0.0360624
62	0.085	0.36	0.9025	0.00141421	0.388909	0.0346482
64	0.086	0.369	0.907	0.00141421	0.400222	0.0353553
66	0.0855	0.3695	0.909	0.00212132	0.40093	0.0353553
68	0.0855	0.3685	0.9115	0.00212132	0.399515	0.033234
70	0.0855	0.371	0.9165	0.00212132	0.403051	0.0374767
72	0.0855	0.3705	0.922	0.00212132	0.402344	0.0296985
PMB 2+OMVs 1st	average			stdev
	WT+	Low+	High+	WT	Low	High
0	0.0925	0.0905	0.0915	0.00212132	0.00212132	0.00212132
2	0.0935	0.0915	0.0925	0.00212132	0.00212132	0.00212132
4	0.1025	0.096	0.1015	0.00494975	0.00282843	0.00212132
6	0.112	0.093	0.147	0.0212132	0.00141421	0.00282843
8	0.115	0.092	0.1725	0.0268701	0.00141421	0.00919239
10	0.1115	0.0895	0.2135	0.0275772	0.000707107	0.00919239
12	0.115	0.092	0.2715	0.0282843	0.00141421	0.0176777
14	0.1155	0.0925	0.3225	0.0289914	0.000707107	0.0106066
16	0.1135	0.094	0.4285	0.026163	0	0.0304056
18	0.1135	0.0925	0.524	0.0304056	0.000707107	0.0353553
20	0.123	0.102	0.601	0.039598	0.00141421	0.0141421
22	0.135	0.1105	0.6955	0.0565685	0.000707107	0.0148492
24	0.1555	0.1225	0.7515	0.0855599	0.00353553	0.0148492
26	0.171	0.138	0.79	0.106066	0.00989949	0.0183848
28	0.1815	0.158	0.8265	0.116673	0.0183848	0.0289914
30	0.2	0.178	0.8555	0.121622	0.0282843	0.033234
32	0.2315	0.2015	0.89	0.123744	0.0346482	0.0367696
34	0.257	0.229	0.9195	0.123037	0.0325269	0.0431335
36	0.268	0.2585	0.9455	0.115966	0.0233345	0.0403051
38	0.293	0.2935	0.975	0.128693	0.026163	0.0424264
40	0.312	0.319	0.989	0.137179	0.0282843	0.0480833
42	0.3355	0.35	1.012	0.157685	0.0353553	0.0523259
44	0.3585	0.3675	1.025	0.171827	0.0388909	0.0579828
46	0.3935	0.391	1.036	0.181726	0.0452548	0.0622254
48	0.429	0.4075	1.037	0.189505	0.0643467	0.059397
50	0.4645	0.437	1.047	0.194454	0.0777817	0.0721249
52	0.5055	0.4745	1.0475	0.191626	0.0997021	0.0671751
54	0.5425	0.51	1.0565	0.178898	0.104652	0.0671751
56	0.5795	0.552	1.061	0.156271	0.111723	0.0721249
58	0.6115	0.5815	1.0715	0.132229	0.105359	0.0770746
60	0.632	0.618	1.072	0.114551	0.0989949	0.0749533
62	0.6525	0.6375	1.08	0.0997021	0.0883883	0.079196
64	0.6715	0.656	1.0865	0.0841457	0.079196	0.0770746
66	0.685	0.677	1.0905	0.0735391	0.0777817	0.0756604
68	0.6915	0.683	1.094	0.0601041	0.0806102	0.0763675
70	0.7055	0.6945	1.095	0.0516188	0.0784889	0.0735391
72	0.7185	0.6905	1.1	0.0403051	0.0671751	0.0650538
