# Supplementary material for: A novel decoy strategy for polymyxin resistance in Acinetobacter baumannii
Source: eLife. 2021 Jun 28;10:e66988. doi: 10.7554/eLife.66988 (PMC8324293; doi:10.7554/eLife.66988)
Supplement: Figure 6—source data 1. [file elife-66988-fig6-data1.xlsx]

## Sheet: Sheet1
Figure 6A	Strains	OMV production	Protection rate (%)
	PMRHigh	81.0113	19.92
	Lab-WT	40	6.12
	NCCP 16007	57.971	24.1
	NCCP 15997	53.2319	33.23
	F-1025	51.6667	21.83
	F-1379	43.3333	11.01
	F-1410	42.6667	13
	NCCP 16005	41.4013	23.01
	NCCP 15993	38.6533	18.51
	NCCP 15991	37.8788	33
	NCCP 16009	29.4611	23.51
	NCCP 16010	28.2482	23.11
	NCCP 15995	35.2294	18.42
	NCCP 16008	28.0723	18.29
	NCCP 14607	26.2482	18.19
	NCCP 16002	26.1364	18.49
	NCCP 15994	33.3546	16.13
	NCCP 15989	24.1477	15.92
	NCCP 16006	26.9811	12.22
	NCCP 16003	26.8067	12.39
	NCCP 12277	29.3454	11.19
	NCCP 14609	25.4946	11.32
	NCCP 15992	31.0728	10.99
	NCCP 15998	30.0481	10.28
	F-1629	27.3333	10.92
	NCCP 14608	24.885	10.82
	NCCP 15987	23.5405	10.22
	NCCP 12278	20.5993	10.75
	NCCP 16004	18.2927	10.39
	NCCP 12276	21.9665	8
	NCCP 14654	20.9713	8.32
	NCCP 16001	19.7133	8.19
	F-1208	33.6667	6.21
	NCCP 14782	23.0352	6.29
	NCCP 15990	21.6942	6.51
	NCCP 14606	19.9338	6.5
	NCCP 15999	17.0683	6.91
	NCCP 16000	13.9296	6.19
	NCCP 14655	22.5156	5.32
	NCCP 15988	18.1298	5.33
	NCCP 16011	23.8504	2.15
	NCCP 15996	20.0846	2.03
