# Supplementary material for: A novel decoy strategy for polymyxin resistance in Acinetobacter baumannii
Source: eLife. 2021 Jun 28;10:e66988. doi: 10.7554/eLife.66988 (PMC8324293; doi:10.7554/eLife.66988)
Supplement: Figure 7—source data 1. [file elife-66988-fig7-data1.xlsx]

## Sheet: Sheet1
Figure 7B	Sample	1	6213	12425	18636	24848	31060	37272	43484	49695	55907	62119	68331	74542	80754	86966	93178	99390	105601	111813	118025
	Control	1	25.62	30.9	34.37	37.26	39.39	41.27	43.29	44.41	45.52	46.82	48.42	49.09	49.92	50.74	51.75	52.38	53.28	54.3	56
	PMB	1	67.1	75.98	81.05	84.64	86.49	88.68	90.65	92.76	94.74
	PMB->OMV	1	28.39	34.96	38.5	41.06	43.13	45.79	46.39	48.03	48.86	49.76	50.86	51.52	52.08	52.81	53.5	53.68
Figure 7D	Enterococcus faecalis KACC 11304	0h	24h	48h	72h	96h	120h
	Aerobic	0	0.45	0.524	0.561	0.559	0.564
	Aerobic + PMB	0	0.488	0.5525	0.617	0.537	0.562
	Anaerobic	0	0.3748	0.4648	0.4598	0.4275	0.449667
	Anaerobic + PMB	0	0.2838	0.4152	0.4012	0.386	0.348333
	stdv		0.050395	0.11134	0.055953	0.038891	0.110677
			0.138938	0.065779	0.052074	0.031193	0.024173
	Enterococcus faecium KACC 11954	0h	24h	48h	72h	96h	120h
	Aerobic	0	0.307	0.412	0.355	0.337	0.3
	Aerobic + PMB	0	0.361	0.418	0.37	0.35	0.343
	Anaerobic	0	0.16525	0.2475	0.285	0.2415	0.2525
	Anaerobic + PMB	0	0.0248	0.02	0.064	0.08233	0.091667
	stdv		0.076865	0.000707	0.020952	0.002121	0.024749
			0.025927	0.01	0.08747	0.128889	0.069924
